1 **The physiological regulation of macropinocytosis during**  
2 ***Dictyostelium* growth and development**

3

4

5 **Thomas D. Williams<sup>1</sup> and Robert R. Kay<sup>1</sup>**

6

7 **<sup>1</sup> MRC-Laboratory of Molecular Biology, Francis Crick Avenue, Cambridge,**  
8 **CB2 0QH, UK**

9

10 **Correspondence: [rrk@mrc-lmb.cam.ac.uk](mailto:rrk@mrc-lmb.cam.ac.uk)**

11

12 **Keywords: *Dictyostelium*, macropinocytosis, endocytosis, flow cytometry**

13

14 **Summary**

15

16 A high-throughput flow cytometry assay shows that macropinocytosis in *D.*  
17 *discoideum* is upregulated in the presence of nutrients and absence of bacteria.  
18 Development and bacteria induce cells to downregulate macropinocytosis.

19

20

21 **Abstract**

22

23 Macropinocytosis is a conserved endocytic process used by *Dictyostelium*  
24 amoebae for feeding on liquid medium. To further *Dictyostelium* as a model for  
25 macropinocytosis, we developed a high-throughput flow cytometry assay for  
26 macropinocytosis, and used it to identify inhibitors and investigate the  
27 physiological regulation of macropinocytosis. *Dictyostelium* has two feeding  
28 states: phagocytic and macropinocytic. When cells are switched from phagocytic  
29 growth on bacteria to liquid media, the rate of macropinocytosis slowly  
30 increases, due to increased size and frequency of macropinosomes. Upregulation  
31 is triggered by a minimal medium of 3 amino acids plus glucose and likely  
32 depends on macropinocytosis itself. Bacteria suppress macropinocytosis while  
33 their product, folate, partially suppresses upregulation of macropinocytosis.  
34 Starvation, which initiates development, does not of itself suppress  
35 macropinocytosis: this can continue in isolated cells, but is shut down by a  
36 conditioned-medium factor or activation of PKA signalling. Thus  
37 macropinocytosis is a facultative ability of *Dictyostelium* cells, regulated by  
38 environmental conditions that are identified here.

39

## 40 **Introduction**

41

42 Macropinocytosis, first described in the 1930s (Lewis, 1931), is a process of  
43 large-scale, non-specific fluid uptake carried out by a wide variety of cells. Actin-  
44 driven protrusions from the plasma membrane form cup-shaped circular ruffles  
45 that can be several microns in diameter. When a ruffle closes it engulfs and  
46 delivers extracellular material to the cell interior in macropinosomes.

47 Macropinosomes proceed through the endocytic system where their contents  
48 can be broken down by digestive enzymes and useful metabolites extracted  
49 (Buckley and King, 2017).

50

51 In the immune system, dendritic cells and macrophages use macropinocytosis to  
52 sample environmental antigens for presentation to B and T cells (Sallusto et al.,  
53 1995, Norbury et al., 1995). Certain bacteria and viruses can utilise  
54 macropinocytosis to invade host cells (Marechal et al., 2001, Nanbo et al., 2010,  
55 Hardt et al., 1998), while other bacteria stimulate macropinocytosis to promote  
56 toxin internalisation (Lukyanenko et al., 2011). Prions and neurodegenerative  
57 protein deposits also invade new host cells through macropinocytosis (Magzoub  
58 et al., 2006, Fevrier et al., 2004, Munch et al., 2011, Falcon et al., 2015). Tumour  
59 cells can maintain a high rate of macropinocytosis (Lewis, 1937), with Ras-  
60 activated cancer cells obtaining a substantial part of their nutrition in this way  
61 (Commisso et al., 2013).

62

63 Considering its widespread importance, the basic biology of macropinocytosis is  
64 poorly understood. It has been studied most intensively in tissue culture cells,  
65 particularly macrophages, although genetic screens have been performed in *C.*  
66 *elegans* (Fares and Greenwald, 2001) and *Dictyostelium discoideum* (Bacon et al.,  
67 1994). *Dictyostelium* in particular has great potential as a model because of the  
68 high constitutive rate of macropinocytosis maintained by cells in the right  
69 circumstances and because the evolutionary distance from mammalian cells  
70 should allow conserved, core features to be discerned.

71

72 The high rate of macropinocytosis by standard axenic strains of *Dictyostelium*  
73 used in the laboratory is due to deletion of the RasGAP, NF1 (Bloomfield et al.,  
74 2015). This mutation allows cells to grow in nutrient media without a bacterial  
75 food source (hence axenic). Wild isolates also perform macropinocytosis,  
76 although the rate of fluid uptake is too low to allow growth in the standard  
77 media for laboratory-adapted axenic strains. These strains can, however, grow in  
78 medium supplemented with additional nutrients (Maeda, 1983, Bloomfield et al.,  
79 2015).

80

81 Axenic strains form frequent, large macropinosomes. The macropinocytic cups  
82 are organized around intense patches of active Ras, Rac and plasmanylinositol  
83 (3,4,5)-trisphosphate (PIP3) (Hoeller et al., 2013, Parent et al., 1998, Veltman et  
84 al., 2016) (In *Dictyostelium* PIP3 is a plasmanylinositide, rather than a  
85 phosphatidylinositide (Clark et al., 2014)), with SCAR/WAVE and WASP localised  
86 to their periphery (Veltman et al., 2016). SCAR/WAVE and WASP activate the  
87 Arp2/3 complex to polymerise actin and form a macropinocytic cup, which is  
88 also known as a crown, or circular ruffle. The cup may be supported by actin  
89 polymerization around the base driven by a Ras-activated formin (Junemann et  
90 al., 2016).

91

92 The rate of fluid uptake through macropinocytosis by axenic cells is regulated by  
93 environmental factors, principally whether the cells' nutrient source is growth  
94 media or bacteria (Kayman and Clarke, 1983, Aguado-Velasco and Bretscher,  
95 1999) and their developmental state (Maeda, 1983, Katoh et al., 2007).

96 Macropinocytosis is additionally affected by the stage of the cell cycle and the  
97 concentration of bacterial peptone in the medium (Maeda, 1988), as well as the  
98 incubation temperature and the pH (Maeda and Kawamoto, 1986). For certain  
99 mutants, fluid uptake is dependent upon whether cells are attached to a surface  
100 or in shaking suspension (Novak et al., 1995).

101

102 Fluid uptake by standard axenic strains of *Dictyostelium*, such as Ax2, is almost  
103 entirely due to macropinocytosis and can be accurately measured by following  
104 the uptake of fluorescent dextran as a fluid phase marker (Kayman and Clarke,

105 1983, Thilo and Vogel, 1980, Hacker et al., 1997). We have developed a high-  
106 throughput assay to measure macropinocytosis in *Dictyostelium*, identified  
107 useful inhibitors and sought to better understand how macropinocytosis is  
108 physiologically regulated during the switch between macropinocytic and  
109 phagocytic feeding and the growth-to-development transition.

## 110 **Results**

111

### 112 **Measurement of uptake by high-throughput flow cytometry**

113

114 Macropinocytosis accounts for more than 90% of fluid uptake by axenic strains  
115 of *Dictyostelium*, and can therefore be followed by measuring fluid uptake  
116 (Hacker et al., 1997). However, existing methods based on processing individual  
117 cell pellets after uptake of fluorescent dextran are of relatively low throughput.  
118 We therefore developed a high-throughput assay using flow cytometry to  
119 measure TRITC-dextran uptake. The assay is performed in 96-well plates and,  
120 after loading with TRITC-dextran, the cells are washed *in-situ* by ‘dunk-banging’  
121 and detached using sodium azide (Glynn and Clarke, 1984) (Figure 1A), which  
122 also prevents exocytosis of internalized dextran (Figure 1B). Plates are analysed  
123 by flow cytometry using a High-Throughput Sampling attachment to load the  
124 flow cytometer, and subsequent analysis is performed using Flowjo, which easily  
125 distinguishes *Dictyostelium* cells from beads and bacteria, but not yeast (Figure  
126 1C). A principle advantage of flow cytometry is that the fluorescence of  
127 internalized TRITC-dextran can be determined for single cells (Figure 1D). The  
128 accumulation of TRITC-dextran proceeds in a uniform fashion across the  
129 population over time, with an extended lagging edge of cells with lower uptake.  
130 Median fluid internalisation over time by Ax2 cells is quantified in figure 1E.

131

132 Controls show the efficiency of the wash step (Figure S1A); that Ax2 cells take up  
133 similar volumes of liquid whether in suspension or attached to a surface (as in  
134 the assay- Figure S1B), although this is not true for all strains (Novak et al.,  
135 1995); and the range of cell numbers that can be accommodated per well (Figure  
136 S1C). The assay is calibrated in terms of volume taken up per cell by reference to  
137 measurements of uptake by the same cell population using a fluorimeter (Figure  
138 S1D) and standardised over time using Flow-Set fluorosphere calibration beads  
139 (Beckman Coulter). Phagocytosis of beads (Figure S1E) and bacteria (Figure  
140 S1F) as well as membrane uptake (Figure S1G) can be readily measured.

141

### 142 **Effect of inhibitors on macropinocytosis**

143

144 Inhibitors are powerful tools for acutely interfering with biological processes,  
145 but relatively few are currently known for macropinocytosis. We therefore  
146 tested a number of inhibitors affecting both the cytoskeleton and cellular  
147 signalling. These were added to Ax2 cells growing in HL5 medium at the start of  
148 the uptake assay, with the TRITC-dextran. The internalised fluorescence was  
149 measured 1 hour later (Table 1). A number of inhibitors were without effect,  
150 although whether this is due to lack of inhibitor uptake, target interaction or the  
151 target not functioning in macropinocytosis is unknown.

152

153 As macropinocytosis is an actin-dependent process, we tested a number of  
154 inhibitors of actin dynamics. Latrunculin B efficiently inhibited  
155 macropinocytosis at standard concentrations (Figure S2A), as expected from its  
156 profound effects on the actin cytoskeleton (Pramanik et al., 2009). Cytochalasin  
157 A, as previously reported (Hacker et al., 1997), inhibited macropinocytosis  
158 (Figure S2B). Inhibitors of the Arp2/3 complex (CK666, Figure S2C), WASP  
159 (Wiskostatin, Figure S2D) and formins (SMIFH2, Figure S2E) were all potent  
160 inhibitors of macropinocytosis, consistent with the localization of the target  
161 proteins to macropinosomes, the macropinocytosis defects in WASP (Veltman et  
162 al., 2016) and ForG (Junemann et al., 2016) mutants and the axenic growth  
163 defect of an ArpB mutant (Langridge and Kay, 2007).

164

165 The microtubule inhibitors nocodazole (Figure S2F) and thiabendazole (Figure  
166 S2G) both partially inhibited fluid uptake, indicating a role for microtubules. The  
167 myosin II inhibitor blebbistatin had no effect on macropinocytosis, in contrast to  
168 previously published data (Shu et al., 2005). This may be because, in our hands,  
169 blebbistatin readily precipitated at concentrations above those used.

170

171 Macropinosomes are organised around active Rac/Ras/PIP3 patches (Hoeller et  
172 al., 2013, Veltman et al., 2016) and, accordingly, the PI3-kinase (PI3K) inhibitor  
173 LY294002 (Figure S2H) inhibits fluid uptake. TGX221, which targets the  
174 mammalian p110 $\beta$  PI3K isoform, inhibited macropinocytosis (Figure S2I)  
175 whereas inhibitors targeting  $\alpha$  and  $\gamma$  isoforms did not. We found the Rac

176 inhibitor EHT1864 (Shutes et al., 2007) is a potent inhibitor of fluid uptake  
177 (Figure S2J).

178

179 In mammalian cells macropinocytosis of free amino acids, notably leucine,  
180 induces mTORC1 activation (Yoshida et al., 2015), allowing cell proliferation.  
181 Rapamycin, a TORC1 specific inhibitor, did not affect fluid uptake when applied  
182 acutely, as found previously, although it does prevent proliferation (Rosel et al.,  
183 2012). It has been suggested that there are functions of mTORC1 that are not  
184 inhibited by rapamycin, but are by more potent, less specific, mTor inhibitors  
185 (Thoreen and Sabatini, 2009). We therefore tried alternative Tor inhibitors and  
186 observed an inhibition of macropinocytosis in cells treated with torin 1 (Figure  
187 S2K), but not palomid 529 or PP242. Whether this is due to greater inhibition of  
188 TORC1, inhibition of TORC2, or both is not clear: TORC2 has previously been  
189 described as having no function in *Dictyostelium* macropinocytosis (Rosel et al.,  
190 2012), however we see a reduction in macropinocytosis when TORC2  
191 components are knocked out in the Ax2 strain used here (not shown).

192

193 The nearest to diagnostic inhibitors for macropinocytosis in mammalian cells are  
194 amiloride and EIPA, which block the plasma membrane Na<sup>+</sup>/H<sup>+</sup> exchanger, thus  
195 affecting sub-membranous pH (Koivusalo et al., 2010). Although *Dictyostelium*  
196 possesses two Na<sup>+</sup>/H<sup>+</sup> exchangers (Patel and Barber, 2005, Fey et al., 2013), it is  
197 not known whether they are sensitive to these drugs and we find that the drugs  
198 do not affect macropinocytosis. The removal of extracellular calcium by EGTA  
199 inhibits constitutive macropinocytosis in immune cells (Canton et al., 2016), but  
200 had no effect on macropinocytosis by *Dictyostelium* incubated in a calcium-free  
201 medium (50 mM lysine, 55 mM glucose in 50 mM MES, pH 6.5) indicating that  
202 extracellular calcium is not required. Indeed, high extracellular calcium  
203 concentrations are reported to inhibit *Dictyostelium* macropinocytosis (Maeda  
204 and Kawamoto, 1986).

205

206 These results support previous genetic studies showing that macropinocytosis  
207 depends on PI3K, Rac and actin dynamics controlled through SCAR/WAVE,  
208 WASP and formins. On the other hand, regulation through extracellular calcium



209 is not part of a core, conserved mechanism of macropinocytosis across species,  
210 while roles for the Na<sup>+</sup>/H<sup>+</sup> exchanger and Tor have not been confirmed.

211

### 212 **Slow switching between feeding strategies**

213

214 Ax2 cells grown on bacteria have a low rate of macropinocytosis, which  
215 increases greatly when they are switched to HL5 growth medium (a complex  
216 medium containing peptone, yeast extract and glucose). A similar, although  
217 much reduced, increase is seen in wild-type NC4 cells (which have an intact NF1  
218 gene) in media enriched with protein (Maeda, 1983).

219

220 We confirmed the upregulation of macropinocytosis in Ax2 cells switched from  
221 growth on bacteria to HL5 (Figure 2A). It is slow, taking about 10 hours (Figure  
222 2B), similar to Ax3 (Kayman and Clarke, 1983), and involves both an increased  
223 rate of macropinosome formation (Figure 2C) and size (Figure 2D). A 50%  
224 increase in diameter, as seen here, would lead to a 3-4 fold increase in  
225 macropinosome volume.

226

227 Wild-type DdB cells (the parent of the standard Ax2, Ax3 and Ax4 strains) with  
228 an intact NF1 gene do not noticeably upregulate macropinocytosis in HL5  
229 (Figure 2A). However, if DdB cells are switched to HL5 supplemented with 10%  
230 FCS (Gibco, providing ~4 mg ml<sup>-1</sup> additional protein), in which they can  
231 proliferate (Bloomfield et al., 2015), they substantially upregulate  
232 macropinocytosis, although not as much as Ax2. The increased fluid uptake by  
233 DdB cells in this case appears to be due only to an increased rate of  
234 macropinosome formation (Figure 2E), with no detectable increase in size  
235 (Figure 2F). Thus the macropinocytic rate of wild-type cells is also controlled by  
236 the availability of environmental nutrients, as in Ax2 cells.

237

238 Ax2 and other axenic cells can consume yeast and other large particles, but this  
239 ability depends on the loss of the NF1 gene and is not shared by wild-type cells  
240 (Bloomfield et al., 2015). Thus the abilities to phagocytose large particles and to  
241 take in large volumes of fluid by macropinocytosis are linked as both depend on

242 the loss of NF1. We asked whether this linkage is also seen at a physiological  
243 level. It is apparent from Figure S3A that it is: Ax2 cells adapted to HL5 medium  
244 and with a high macropinocytic rate can take up yeast or large beads (2 micron  
245 diameter) much better than the same cells grown on bacteria, which have a low  
246 macropinocytic rate. Uptake of either particle by DdB cells, which have an intact  
247 NF1 gene, was unaltered by the nutritional environment they came from (Figure  
248 S3B), consistent with the unaltered macropinosome size observed in figure 2F.

249  
250 The macropinocytic and phagocytic states are not mutually exclusive, as we  
251 found that Ax2 cells fully adapted to HL5 maintain a relatively high rate of  
252 phagocytosis of bacteria (Figure S3C). We therefore asked what happens when  
253 Ax2 cells are presented with both bacteria and liquid medium for food. In this  
254 case, irrespective of whether the cells had been grown on bacteria or HL5, they  
255 adopted a low rate of macropinocytosis (Figure S3D).

256  
257 These results show that *Dictyostelium* has two basic feeding modes: the  
258 preferred mode is phagocytosis, which is seen with cells growing on bacteria.  
259 Alternatively, cells in liquid media without bacteria adopt a second mode, in  
260 which macropinocytosis is upregulated, although the potential for phagocytosis  
261 of bacteria is retained.

262

### 263 **A minimal set of soluble nutrients can stimulate the upregulation of** 264 **macropinocytosis**

265

266 Ax2 cells do not sustainably increase their rate of macropinocytosis when they  
267 are switched from bacteria to buffer (Figure 2B), but require HL5 medium, or  
268 some components of it, to do so. To identify such stimulatory components, we  
269 first showed that HL5 could be replaced by the SIH defined medium (Figure 3A)  
270 and then dissected this defined medium to find the active components. Leaving  
271 out blocks of components showed that vitamins and micro-minerals are not  
272 necessary for macropinocytic upregulation and that the effect is accounted for by  
273 amino acids and glucose alone (Figure 3B). Testing amino acids individually  
274 showed that only arginine, lysine and glutamate induce macropinocytosis

275 upregulation at the tested concentrations (Table S1). Consistent with this,  
276 removal of these amino acids from SIH severely impairs the ability of cells to  
277 upregulate macropinocytosis, which is restored when the amino acids are  
278 returned to the medium (Figure 3C). Testing different sugars showed that only  
279 glucose and other metabolizable sugars that can support cell growth permit  
280 macropinocytosis upregulation (Table S2) (Watts and Ashworth, 1970,  
281 Ashworth and Watts, 1970).

282

283 Based on these results, a simplified medium for macropinocytosis upregulation,  
284 SUM (Simple Upregulation Media) was devised, consisting of KK<sub>2</sub>MC plus 55 mM  
285 glucose, 4 mM arginine, 3.7 mM glutamate and 8.5 mM lysine (the same  
286 concentrations as SIH) at pH 6.5. SUM induces nearly the same level of  
287 macropinocytosis as complete SIH, with faster upregulation kinetics (Figure 3D).  
288 Although cells remain healthy in SUM for several days, it does not support long-  
289 term growth. SUM has very low background fluorescence, and we have found it  
290 very useful for microscopy, particularly for cells with weakly expressed markers,  
291 such as knock-ins. Cells can be grown rapidly on bacteria before transfer to SUM  
292 a few hours prior to microscopy, during which time macropinocytosis is greatly  
293 upregulated.

294

295 These results show that macropinocytosis upregulation can be induced by only a  
296 handful of the components present in defined medium, while the requirement  
297 for the sugar to be metabolizable hints that sugars may be sensed through their  
298 effects on metabolism, rather than by dedicated receptors.

299

### 300 **Macropinocytosis is required for efficient upregulation of** 301 **macropinocytosis**

302

303 We envisioned that nutrients that cause macropinocytosis upregulation might  
304 either be sensed by dedicated receptors, such as for glutamate, or indirectly  
305 through their effect on metabolism, or a combination of both. Since nutrients  
306 obtained by macropinocytosis can only be utilized after internalization and  
307 digestion, this second route implies that macropinocytic upregulation would

308 depend on macropinocytosis itself. To test this idea we turned to the inhibitors  
309 identified earlier in this work to inhibit macropinocytosis during upregulation.  
310 As this experiment requires prolonged inhibitor treatment, we first tested how  
311 well cells recover from the inhibitors. Ax2 cells growing in HL5 recover quite  
312 well from prolonged treatment with LY294002, TGX221 (both PI3K), CK666  
313 (Arp2/3 complex), EHT1864 (Rac) and torin 1 (Tor) (Figure S4A-E). Prolonged  
314 incubation with other inhibitors was too deleterious to make them useful.

315

316 We next used the inhibitors to determine to what extent the upregulation of  
317 macropinocytosis is affected by inhibiting macropinocytosis (Figure 4 'raw'  
318 curves), also making a correction for the relatively small deleterious effects of  
319 long-term exposure of cells to the inhibitors (Figure 4, 'corrected' curves).  
320 Although these inhibitors affect macropinocytosis through different targets, they  
321 all inhibit upregulation (measured after 10 hours incubation in HL5) in a dose-  
322 dependent manner (Figure 4A-E). The effect remains even after correcting for  
323 the long-term effects of the inhibitors. Upregulation is not completely abolished  
324 by the inhibitors, reflecting their incomplete inhibition of macropinocytosis.  
325 Thus these results suggest that the upregulation of macropinocytosis by nutrient  
326 media depends on delivery of nutrients into the cell through macropinocytosis.

327

328 We considered the possibility that the ingested nutrients delivered by  
329 macropinocytosis might be detected through the TORC1 complex, similar to  
330 other organisms. Although rapamycin does not inhibit macropinocytosis acutely,  
331 it does somewhat inhibit upregulation (Figure 4F), with extremely mild effects  
332 on control cells (Figure S4F). Torin1, has a stronger effect on upregulation  
333 (Figure 4E), but as it is less specific, some of this might be due to inhibition of the  
334 TORC2 complex. In summary, these results suggest that nutrients causing cells  
335 to increase their rate of macropinocytosis are detected in the macropinocytic  
336 pathway, possibly by TORC1.

337

338 **Sensing of bacteria**

339

340 Bacteria have two distinct effects on the regulation of macropinocytosis. They  
341 inhibit upregulation of macropinocytosis by cells transferred to HL5 (Figure 5A)  
342 and promote downregulation of macropinocytosis by cells transferred from HL5  
343 to buffer, where it otherwise remains high (Figure 5B).

344

345 Bacteria can be sensed through their release of folate, which is a chemoattractant  
346 for *Dictyostelium* and acts through the G-protein coupled receptor fAR1 (Pan et  
347 al., 2016). We found that folate inhibits the upregulation of macropinocytosis  
348 when cells are transferred from bacteria to HL5 (Figure 5C), but has no effect  
349 when cells are transferred from HL5 to buffer (not shown). *fAR1*- cells were  
350 essentially blind to this inhibitory effect of folate (Figure 5D), as were mutants of  
351 the G $\beta$  and G $\alpha$ 4 (Hadwiger and Firtel, 1992) subunits of the cognate hetero-  
352 trimeric G-protein (Figure 5E) (Hadwiger and Srinivasan, 1999) and the  
353 downstream MAP kinase, ErkB (Figure 5F) (Nichols et al., in preparation). Thus  
354 bacteria can exert some, but clearly not all, of their effects on feeding behaviour  
355 through canonical folate signalling.

356

### 357 **Developmental regulation of macropinocytosis**

358

359 Development in *Dictyostelium* is triggered by starvation and over the first 8-10  
360 hours the cells aggregate by chemotaxis to cyclic-AMP. Macropinocytosis is  
361 downregulated during this period (Maeda, 1983, Katoh et al., 2007), and it was  
362 therefore surprising that macropinocytosis continues at a high rate for at least  
363 24 hours in cells starved under buffer (Figure 5B). However, compared to  
364 standard developmental conditions, these cells were starved at low density,  
365 likely causing attenuation of developmental signalling. This suggests that the  
366 downregulation of macropinocytosis during development requires a  
367 developmental signal in addition to starvation.

368

369 Figure 6A confirms that macropinocytosis is strongly downregulated by starving  
370 Ax2 cells (previously grown in HL5) at high density in shaking suspension and  
371 pulsed with cyclic-AMP to mimic developmental signalling. By 5 hours of  
372 development, fluid uptake is negligible. Similar results were obtained when

373 developing cells on non-nutrient agar (not shown). Similarly if the cell density in  
374 96-well plates is increased from 5000 to 50,000 cells per well, the cells can be  
375 seen to aggregate (not shown) and downregulate macropinocytosis (Figure 6B).

376

377 We tested the effects of known developmental signals on macropinocytosis using  
378 cells starving at low cell density. As shown in table S3, the developmental signals  
379 cyclic-AMP, ATP (Ludlow et al., 2008, Traynor and Kay, 2017), adenosine and the  
380 polyketides DIF-1, DIF-2 and MPBD (Morris et al., 1987, Morris et al., 1988, Saito  
381 et al., 2006) were without effect, as was the high cell density signal,  
382 polyphosphate (Suess and Gomer, 2016). However, conditioned medium (CM)  
383 prepared by shaking starving cells at high density for 8 hours was effective, with  
384 the active component(s) being heat-labile and retained by a 30 kDa cut-off  
385 membrane and therefore likely to be protein(s) (Figure 6C). Most likely this  
386 signal is one of the known proteins controlling early developmental events in  
387 *Dictyostelium*, but unfortunately these were unavailable for testing.

388

389 To gain insight into how developmental signals suppress macropinocytosis, we  
390 examined possible signal transduction routes, focussing on cyclic-AMP  
391 dependent protein kinase (PKA), which is a crucial mediator of both early and  
392 late events in development (Mann and Firtel, 1991, Harwood et al., 1992, Kay,  
393 1989). PKA can be directly activated using the membrane-permeable analogue  
394 of cyclic-AMP, 8-bromo-cyclic-AMP (8-Br-cAMP) and we found that this, unlike  
395 cyclic-AMP, causes up to a 50% downregulation of macropinocytosis in starving,  
396 low-density cells (Figure 6D). High concentrations are required, but these are  
397 comparable to those used previously (Kay, 1989).

398

399 The involvement of PKA is strongly supported by mutants with elevated  
400 intracellular cyclic-AMP levels, due to defective breakdown. The hybrid cyclic-  
401 AMP phosphodiesterase RegA is activated by a His/Asp phospho-relay in which  
402 RdeA is the essential phosphate carrier protein (Shaulsky et al., 1998, Thomason  
403 et al., 1999, Thomason et al., 1998, Chang et al., 1998). Elimination of either  
404 protein results in strong downregulation of macropinocytosis in starving cells at  
405 low density (Figure 6E).

406

407 Conversely eliminating PKA activity by mutation of the catalytic subunit (*pkaC*-  
408 cells; (Primpke et al., 2000)) results in cells where macropinocytosis remains  
409 high for at least 24 hours after starvation, even if they are at high cell density or  
410 treated with CM (Figure 6F). Combined, these results strongly argue that  
411 macropinocytosis is downregulated in starving cells by PKA activation. These  
412 results are also relevant to the interpretation of recent work (Scavello et al.,  
413 2017) showing that *pkaC*- cells have a strong defect in chemotaxis to cyclic-AMP  
414 (see Discussion).

## 415 **Discussion**

416

417 To facilitate work on macropinocytosis in *Dictyostelium*, we have developed a  
418 high-throughput assay to measure fluid, membrane or particle uptake with  
419 single cell resolution. While this is by no means the first use of flow cytometry  
420 for these purposes (Bacon et al., 1994, Pan et al., 2016, King et al., 2013), the  
421 high-throughput nature of the assay provides a distinct advantage over previous  
422 techniques. A screen of inhibitors provides new tools for acute inhibition of  
423 macropinocytosis and further supports the involvement of PI3K, Rac, WASP,  
424 formins and the Arp2/3 complex expected from genetic and subcellular  
425 localization studies (Hoeller et al., 2013, Langridge and Kay, 2007, Dumontier et  
426 al., 2000, Veltman et al., 2016, Junemann et al., 2016).

427

428 Macropinocytosis in *Dictyostelium* occurs at a high rate in conditions where the  
429 cells are able to proliferate in liquid medium. However it is under physiological  
430 control with cells able to slowly transition between high and low macropinocytic  
431 states according to whether bacteria or soluble nutrients are available. In these  
432 transitions the frequency of macropinosome formation is altered: in axenic cells,  
433 where the active Ras patches are unconstrained by NF1, macropinosome size is  
434 additionally increased. Wild-type cells with an intact NF1 gene also transition  
435 between low and high macropinocytic states according to the nutrients available,  
436 showing that this regulation is not just a feature of axenic strains (this work,  
437 Maeda, 1983). The presence of a high macropinocytic state in wild-type cells  
438 suggests there are ecological circumstances where macropinocytosis is used for  
439 feeding, though these are yet to be defined.

440

441 Ax2 cells in the low macropinocytic state can sense bacteria through their  
442 secretion of folic acid, inhibiting macropinocytic upregulation accordingly.  
443 However, due to the relatively modest effects of folate, and the fact that it does  
444 not induce downregulation of macropinocytosis, it seems certain that other  
445 sensory pathways also play a prominent role. It has recently been reported that  
446 certain bacteria secrete cyclic-AMP, which functions as a chemoattractant for



447 vegetative *Dictyostelium* (Meena and Kimmel, 2017), however cyclic-AMP did not  
448 affect macropinocytosis up- or downregulation.

449

450 We find that four nutrients from defined medium are largely responsible for  
451 inducing macropinocytosis upregulation in Ax2 cells: arginine, glutamate, lysine  
452 and a metabolisable sugar. None of the other amino acids appears effective  
453 individually, and even in combination they only have a modest effect. Arginine  
454 and lysine are essential amino acids, but glutamate is not (Marin, 1976, Franke  
455 and Kessin, 1977). *Dictyostelium* has several receptors similar to metabotropic  
456 glutamate receptors (Taniura et al., 2006, Fey et al., 2013), but it seems likely  
457 that the major route for nutrient sensing is intracellular, with nutrients delivered  
458 by macropinocytosis.

459

460 In mammalian cells, free amino acids obtained by macropinocytosis are sensed  
461 through mTORC1 (Yoshida et al., 2015), which is recruited to the lysosome by  
462 Rag proteins and activated (Sancak et al., 2010). Activation of mTORC1 inhibits  
463 autophagy. *Dictyostelium* autophagy can be induced within minutes by removal  
464 of arginine and lysine (King et al., 2011), the same amino acids that induce  
465 macropinocytosis upregulation. This argues that TORC1 is activated by arginine  
466 and lysine in *Dictyostelium* to both upregulate macropinocytosis and inhibit  
467 autophagy. Though the TORC1-specific inhibitor rapamycin does not induce  
468 *Dictyostelium* autophagy (Dominguez-Martin et al., 2017), other mTor inhibitors  
469 are more effective (Cardenal-Munoz et al., 2017), suggesting that rapamycin is a  
470 relatively poor inhibitor for some *Dictyostelium* TORC1 processes, as has been  
471 suggested in mammalian cells (Thoreen and Sabatini, 2009). The more potent,  
472 but less specific, inhibitor torin 1 inhibits both macropinocytosis and  
473 macropinocytosis upregulation, although this is likely to be at least partially due  
474 to TORC2 inhibition.

475

476 As only metabolizable sugars induce upregulation of macropinocytosis, it is  
477 probable that the sensing of these is through a general metabolic readout, such  
478 as the presence of ATP, which is produced during glycolysis. Increased levels of  
479 AMP and ADP, as in nutrient poor conditions (such as without sugar), activate

480 AMP-kinase. Overexpression of a constitutively active AMP-kinase  $\alpha$  subunit in  
481 *Dictyostelium* inhibits growth but does not affect macropinocytosis (Bokko et al.,  
482 2007), similar to what we observe in low-density starvation conditions. It may  
483 therefore be the case that in the absence of a sugar source AMP-kinase is  
484 activated, which could prevent full macropinocytosis upregulation.

485

486 Our results show that the cessation of macropinocytosis during early  
487 development requires a developmental signal that most likely acts through PKA.  
488 Macropinocytosis does not cease immediately when cells are starved, but  
489 decreases over several hours and so may occur at reduced levels in cells that are  
490 used for studying chemotaxis to cyclic-AMP, particularly in mutants with a defect  
491 in early development. This can be a confounding influence on studies of  
492 chemotaxis, since macropinocytosis uses the same actin machinery as  
493 pseudopods and thus impairs chemotaxis (Veltman, 2015). In particular, we  
494 found that macropinocytosis continues at a high rate in mutants of the PKA  
495 catalytic subunit, possibly accounting for the strong chemotactic defect of these  
496 strains (Scavello et al., 2017). This could also be a confounding issue for some  
497 other strains with early developmental defects (Khosla et al., 2005, Wu et al.,  
498 1995, Rodriguez et al., 2008, Lee et al., 2005).

499

500 Many of the molecular components required for macropinocytosis in  
501 *Dictyostelium* are the same as those in mammalian cells: actin, Arp2/3, PI3K,  
502 SCAR/WAVE, WASP, Rac and Ras proteins. This conservation of the core  
503 components suggests that macropinocytosis may have first arisen in simple  
504 protists as a way of feeding in the absence of bacterial prey. In mammalian cells  
505 there are additional levels of regulation, some of which are cell-type specific  
506 (such as the calcium requirement in immune cells) and others that are more  
507 generic (such as growth factor stimulated macropinocytosis). We believe that  
508 *Dictyostelium* is an excellent model organism for establishing the core, conserved  
509 elements of macropinocytosis and their function.

510

## 511 **Materials and Methods**

512

### 513 *Cell culture and materials*

514

515 Cells were cultivated at 22°C. HL5, SIH, variants of SIH and SM media were from  
516 Formedium. Unless otherwise specified, cells were grown on *Klebsiella aerogenes*  
517 (*Ka*) lawns on SM plates and harvested for experiments from the feeding front,  
518 washing three times with KK<sub>2</sub> (16.6 mM KH<sub>2</sub>PO<sub>4</sub>, 3.8 mM K<sub>2</sub>HPO<sub>4</sub>, pH 6.1) by  
519 centrifugation (280 *g*, 3 min) to remove the bacteria. Cells were also grown in  
520 tissue culture plates with *Ka* as a food source. In this case *Ka* was added to  
521 KK<sub>2</sub>MC (KK<sub>2</sub> + 2 mM MgSO<sub>4</sub>, 100 μM CaCl<sub>2</sub>) to 2 OD<sub>600 nm</sub> from a 100 OD<sub>600 nm</sub>  
522 stock (these bacteria were grown overnight in 2xTY, pelleted by centrifugation  
523 and washed twice in KK<sub>2</sub>).

524

525 Cells were grown axenically in HL5 in conical flasks with shaking at 180 rpm.  
526 Media derived from SIH, including SUM, were made in KK<sub>2</sub>MC pH 6.5.  
527 Conditioned medium was made by washing axenically grown Ax2 cells free of  
528 HL5, resuspending them to 1x10<sup>7</sup> cells ml<sup>-1</sup> in KK<sub>2</sub>MC and incubating for 8 hours,  
529 180 rpm, before removing the cells by centrifugation (2400 *g*, 10 min). Strains  
530 are listed in Table S4.

531

532 For transformation, cells were harvested from bacteria, resuspended in H40  
533 buffer (40 mM Hepes, 1 mM MgCl<sub>2</sub>, pH 7.0), mixed with 500 ng vector for a PIP3  
534 reporter (PkgE-PH mCherry), electroporated in ice-cold 2 mm cuvettes  
535 (Novagen) using a square wave protocol (2x 350 volts, 8 ms apart), then  
536 transferred to 2 ml KK<sub>2</sub>MC + *Ka* in a 6 well plate to recover for 5 hours, before  
537 G418 selection was added to 10 μg ml<sup>-1</sup>.

538

539 Chemicals were from Sigma unless otherwise indicated. Polyphosphate was  
540 obtained from both Spectrum and Merck.

541

### 542 *Uptake measurements by fluorimetry*

543

544 Based on (Rivero and Maniak, 2006): cells at  $1 \times 10^7$  ml<sup>-1</sup> were shaken at 180 rpm  
545 in HL5 with 0.5 mg ml<sup>-1</sup> TRITC-dextran and at each time point triplicate 0.8 ml  
546 samples centrifugally washed once in ice-cold KK<sub>2</sub> and resuspended to 1 ml.  
547 Fluorescence was measured in a fluorimeter (Perkin-Elmer LS 50 B with  
548 excitation at 544 nm, emission at 574 nm, slit width 10 nm). Background '0  
549 minute' fluorescence was subtracted and uptake volume calculated using  
550 standard curves of TRITC-dextran diluted in buffer. Cells loaded in this way  
551 were also analysed by flow cytometry (LSR\_II flow cytometer, BD Biosciences) to  
552 compare the methods.

553

554 To measure yeast uptake, cells were resuspended from bacterial plates or 9 cm  
555 tissue culture dishes where they had been incubated in growth medium to  $5 \times 10^6$   
556 ml<sup>-1</sup> in KK<sub>2</sub>MC in a 5 ml conical flask shaken at 180 rpm, 22°C. TRITC-labelled  
557 yeast (sonicated at level 7.0 for 20 seconds on a Misonix sonicator 3000) were  
558 added to  $1 \times 10^7$  particles ml<sup>-1</sup>. At 0 and 60 minutes duplicate 200 µl samples were  
559 added to 20 µl of Trypan blue quench solution (2 mg ml<sup>-1</sup> in 20 mM citrate, 150  
560 mM NaCl, pH 4.5) on ice, shaken for 3 minutes at 2000 rpm, spun down and  
561 washed twice with ice-cold KK<sub>2</sub> + 10 mM EDTA. The final pellet was resuspended  
562 to 1 ml and the fluorescence compared to a standard curve to give the number of  
563 yeast per cell.

564

565 *Uptake measurements by flow cytometry*

566

567 For high-throughput assays, 50 µl of  $1 \times 10^5$  cells ml<sup>-1</sup> was inoculated into flat-  
568 bottom 96-well plates and incubated at 22°C for the indicated time (usually 24  
569 hours). Then 50 µl of 1 mg ml<sup>-1</sup> TRITC-dextran in the same medium was added.  
570 After one hour, unless otherwise stated, the medium was thrown off, and the  
571 cells washed by 'dunk-banging' (the plate was submerged in a container of ice-  
572 cold KK<sub>2</sub>, which was thrown off and the plate patted dry) before 100 µl KK<sub>2</sub>MC  
573 containing 5 mM sodium azide was added to each well to detach the cells and  
574 stop exocytosis. Cells were analysed by flow cytometry (LSR-II, BD Biosciences)  
575 using the High-Throughput-Sampling attachment, which pipetted them up and  
576 down twice, before analysing 65 µl per sample at 3 µl s<sup>-1</sup>. FlowJo software

577 (<https://www.flowjo.com>) calculated the median (mean in the case of beads)  
578 fluorescence of cells in each well, and then the mean of triplicate wells was  
579 calculated. The mean was then taken of all biological replicates. To determine  
580 volumes taken up, the same population of cells (loaded with TRITC-dextran in  
581 suspension, as above) was analysed by both fluorimetry and flow cytometry. The  
582 LSR\_II was calibrated through all subsequent experiments using FlowSet  
583 fluorospheres calibration beads (Beckman Coulter).

584

585 We also used this method to measure uptake of membrane using 10  $\mu\text{M}$  FM1-43  
586 (Invitrogen); phagocytosis of bacteria using  $1 \times 10^8$  particles  $\text{ml}^{-1}$  Texas-red *E. coli*  
587 bioparticles (Thermo Scientific); or beads of different sizes (YG-beads,  
588 Polysciences): 3  $\mu\text{m}$  ( $2 \times 10^7 \text{ ml}^{-1}$ ), 2.0 and 1.75  $\mu\text{m}$  ( $5 \times 10^7 \text{ ml}^{-1}$ ) or 1.5  $\mu\text{m}$  ( $1 \times 10^8$   
589  $\text{ml}^{-1}$ ). Particles internalised per cell was calculated by comparing the internalised  
590 fluorescence with particles only samples. For time courses, the start time was  
591 staggered so that all time-points ended concurrently. When inhibitors were used  
592 acutely, they were added with the fluorescent medium to the final indicated  
593 concentration. Polyketides were synthesised as described (Morris et al., 1987,  
594 Morris et al., 1988, Saito et al., 2006).

595

596 To initiate development, axenically growing cells were washed twice,  
597 resuspended to  $1 \times 10^7$  cells  $\text{ml}^{-1}$  in  $\text{KK}_2\text{MC}$  and shaken at 180 rpm for one hour  
598 before delivering pulses of  $\text{KK}_2\text{MC}$  containing cyclic-AMP to give a concentration  
599 of 100 nM every 6 minutes using a Watson Marlow 505Di pump. At the indicated  
600 times  $5 \times 10^4$  cells were diluted into dextran containing  $\text{KK}_2\text{MC}$  in 24 well plates  
601 for one hour, after which they were washed *in-situ* using ice-cold  $\text{KK}_2 + 10 \text{ mM}$   
602 EDTA and detached with  $\text{KK}_2\text{MC} + 5 \text{ mM}$  sodium azide. 100  $\mu\text{l}$  was transferred to  
603 duplicate wells in a 96-well plate for flow cytometry analysis.

604

605 Development on agar plates was initiated by settling 1.5 ml of washed, axenically  
606 grown cells at  $2.5 \times 10^7$  cells  $\text{ml}^{-1}$  in  $\text{KK}_2\text{MC}$  onto fresh 1.8%  $\text{KK}_2\text{MC}$  agar in 6 cm  
607 plates. After 15 minutes settling, the media was aspirated off, and the plates kept  
608 on wet tissues at 22°C. At the indicated times, cells were harvested, resuspended  
609 in  $\text{KK}_2\text{MC}$  and  $1 \times 10^5$  inoculated into  $\text{KK}_2\text{MC}$  in a 6-well plate with 0.5  $\text{mg ml}^{-1}$

610 TRITC-dextran for one hour. Cells were then washed *in-situ* and resuspended in  
611  $\text{KK}_2 + 10 \text{ mM EDTA}$  before analysis by low-throughput flow cytometry. The zero  
612 hour time-point was of cells taken immediately after washing.

613

#### 614 *Macropinosome formation rate and diameter*

615

616 The rate of macropinosome formation was determined in  $\text{KK}_2\text{MC}$  by loading cells  
617 in a 2-well microscope slide (Nunc) with  $2 \text{ mg ml}^{-1}$  FITC-dextran for 1 minute,  
618 then washing and fixing with 4% paraformaldehyde for 20 minutes. Fixed cells  
619 were washed 5 times and stored in PBS (pH 5.0) at  $4^\circ\text{C}$  for imaging. Z-stacks with  
620  $0.1 \mu\text{m}$  steps were taken using a Zeiss 700 series microscope with 2x averaging  
621 to reduce noise. Maximum intensity projections were made using FIJI and FITC-  
622 positive endosomes counted by eye. The mean of at least 8 cells on a given day  
623 was taken as one data-point.

624

625 To measure macropinosome diameter at closure, cells in  $\text{KK}_2\text{MC}$  expressing a  
626 PIP3 reporter (PkgE-PH mCherry) were filmed in their central section at 1 frame  
627 per second for 5 minutes on a Zeiss 700 series microscope. The maximum  
628 diameter of macropinosomes at closure was measured using the FIJI measure  
629 tool. Note that this method will underestimate the diameter of macropinosomes  
630 not lying fully within the optical section.

631

#### 632 **Acknowledgements**

633

634 We thank the rest of the Kay lab for their assistance in moulding this project,  
635 particularly Peggy Paschke. Clelia Amato and Robert Insall (Beatson Institute,  
636 Glasgow) alerted us to the Rac inhibitor. Jason King (Sheffield University)  
637 provided valuable feedback on the macropinosome formation experiments. Miao  
638 Pan and Tian Jin (NIAID, Bethesda) kindly sent us the *fAR1*- strain. The MRC-LMB  
639 flow cytometry facility maintained the flow cytometers and provided technical  
640 support.

641

#### 642 **Competing Interests**

643

644 The authors declare that there are no competing interests.

645

### 646 **Author Contributions**

647

648 Both authors designed the experiments, which were carried out by Thomas  
649 Williams.

650

### 651 **Funding**

652

653 We thank the Medical Research Council UK for core funding (U105115237 to  
654 RRK).

655

### 656 **Data availability**

657

658 N/A.

659

### 660 **References**

661

- 662 AGUADO-VELASCO, C. & BRETSCHER, M. S. 1999. Circulation of the plasma  
663 membrane in *Dictyostelium*. *Mol. Biol. Cell*, 10, 4419-4427.
- 664 ASHWORTH, J. M. & WATTS, D. J. 1970. Metabolism of the cellular slime mould  
665 *Dictyostelium discoideum* grown in axenic culture. *Biochem. J.*, 119, 175-  
666 182.
- 667 BACON, R. A., COHEN, C. J., LEWIN, D. A. & MELLMAN, I. 1994. *Dictyostelium*  
668 *discoideum* mutants with temperature-sensitive defects in endocytosis. *J.*  
669 *Cell Biol.*, 127, 387-399.
- 670 BLOOMFIELD, G., TRAYNOR, D., SANDER, S. P., VELTMAN, D. M., PACHEBAT, J. A.  
671 & KAY, R. R. 2015. Neurofibromin controls macropinocytosis and  
672 phagocytosis in *Dictyostelium*. *Elife*, 4, p. e04940.
- 673 BOKKO, P. B., FRANCIONE, L., BANDALA-SANCHEZ, E., AHMED, A. U., ANNESLEY,  
674 S. J., HUANG, X., KHURANA, T., KIMMEL, A. R. & FISHER, P. R. 2007.  
675 Diverse cytopathologies in mitochondrial disease are caused by amp-  
676 activated protein kinase signaling. *Mol. Biol. Cell*, 18, 1874-1886.
- 677 BUCKLEY, C. M. & KING, J. S. 2017. Drinking problems: mechanisms of  
678 macropinosome formation and maturation. *FEBS J.*, 284, 3778-3790.
- 679 CANTON, J., SCHLAM, D., BREUER, C., GUTSCHOW, M., GLOGAUER, M. &  
680 GRINSTEIN, S. 2016. Calcium-sensing receptors signal constitutive  
681 macropinocytosis and facilitate the uptake of NOD2 ligands in  
682 macrophages. *Nat. Commun.*, 7, 11284.

- 683 CARDENAL-MUNOZ, E., ARAFAH, S., LOPEZ-JIMENEZ, A. T., KICKA, S., FALAISE,  
684 A., BACH, F., SCHAAD, O., KING, J. S., HAGEDORN, M. & SOLDATI, T. 2017.  
685 *Mycobacterium marinum* antagonistically induces an autophagic response  
686 while repressing the autophagic flux in a TORC1- and ESX-1-dependent  
687 manner. *PLoS Pathog.*, 13, e1006344.
- 688 CHANG, W. T., THOMASON, P. A., GROSS, J. D. & NEWELL, P. C. 1998. Evidence  
689 that the RdeA protein is a component of a multistep phosphorelay  
690 modulating rate of development in *Dictyostelium*. *EMBO J.*, 17, 2809-2816.
- 691 CLARK, J., KAY, R. R., KIELKOWSKA, A., NIEWCZAS, I., FETS, L., OXLEY, D.,  
692 STEPHENS, L. R. & HAWKINS, P. T. 2014. *Dictyostelium* uses ether-linked  
693 inositol phospholipids for intracellular signalling. *EMBO J.*, 33, 2188-200.
- 694 COMMISSO, C., DAVIDSON, S. M., SOYDANER-AZELOGLU, R. G., PARKER, S. J.,  
695 KAMPHORST, J. J., HACKETT, S., GRABOCKA, E., NOFAL, M., DREBIN, J. A.,  
696 THOMPSON, C. B., RABINOWITZ, J. D., METALLO, C. M., VANDER HEIDEN,  
697 M. G. & BAR-SAGI, D. 2013. Macropinocytosis of protein is an amino acid  
698 supply route in Ras-transformed cells. *Nature*, 497, 633-7.
- 699 DOMINGUEZ-MARTIN, E., CARDENAL-MUNOZ, E., KING, J. S., SOLDATI, T., CORIA,  
700 R. & ESCALANTE, R. 2017. Methods to Monitor and Quantify Autophagy in  
701 the Social Amoeba *Dictyostelium discoideum*. *Cells*, 6.
- 702 DUMONTIER, M., HOCHT, P., MINTERT, U. & FAIX, J. 2000. Rac1 GTPases control  
703 filopodia formation, cell motility, endocytosis, cytokinesis and  
704 development in *Dictyostelium*. *J. Cell Sci.*, 113, 2253-2265.
- 705 FALCON, B., CAVALLINI, A., ANGERS, R., GLOVER, S., MURRAY, T. K., BARNHAM,  
706 L., JACKSON, S., O'NEILL, M. J., ISAACS, A. M., HUTTON, M. L., SZEKERES, P.  
707 G., GOEDERT, M. & BOSE, S. 2015. Conformation determines the seeding  
708 potencies of native and recombinant Tau aggregates. *J. Biol. Chem.*, 290,  
709 1049-65.
- 710 FARES, H. & GREENWALD, I. 2001. Genetic analysis of endocytosis in  
711 *Caenorhabditis elegans*: coelomocyte uptake defective mutants. *Genetics*,  
712 159, 133-45.
- 713 FEVRIER, B., VILETTE, D., ARCHER, F., LOEW, D., FAIGLE, W., VIDAL, M., LAUDE,  
714 H. & RAPOSO, G. 2004. Cells release prions in association with exosomes.  
715 *Proc. Natl. Acad. Sci. USA*, 101, 9683-8.
- 716 FEY, P., DODSON, R. J., BASU, S. & CHISHOLM, R. L. 2013. One stop shop for  
717 everything *Dictyostelium*: dictyBase and the Dicty Stock Center in 2012.  
718 *Methods Mol. Biol.*, 983, 59-92.
- 719 FRANKE, J. & KESSIN, R. 1977. A defined minimal medium for axenic strains of  
720 *Dictyostelium discoideum*. *Proc. Natl. Acad. Sci. USA*, 74, 2157-2161.
- 721 GLYNN, P. J. & CLARKE, K. R. 1984. An investigation of adhesion and detachment  
722 in slime mould amoebae using columns of hydrophobic beads. *Exp. Cell*  
723 *Res.*, 152, 117-126.
- 724 HACKER, U., ALBRECHT, R. & MANIAK, M. 1997. Fluid-phase uptake by  
725 macropinocytosis in *Dictyostelium*. *J. Cell Sci.*, 110, 105-112.
- 726 HADWIGER, J. A. & FIRTEL, R. A. 1992. Analysis of Galpha4, a G-protein subunit  
727 required for multicellular development in *Dictyostelium*. *Genes Devel.*, 6,  
728 38-49.
- 729 HADWIGER, J. A. & SRINIVASAN, J. 1999. Folic acid stimulation of the Galpha4 G  
730 protein-mediated signal transduction pathway inhibits anterior prestalk  
731 cell development in *Dictyostelium*. *Differentiation*, 64, 195-204.



- 732 HARDT, W. D., CHEN, L. M., SCHUEBEL, K. E., BUSTELO, X. R. & GALAN, J. E. 1998.  
733 *S. typhimurium* encodes an activator of Rho GTPases that induces  
734 membrane ruffling and nuclear responses in host cells. *Cell*, 93, 815-26.
- 735 HARWOOD, A. J., HOPPER, N. A., SIMON, M. N., BOUZID, S., VERON, M. &  
736 WILLIAMS, J. G. 1992. Multiple roles for cAMP-dependent protein kinase  
737 during *Dictyostelium* development. *Dev. Biol.*, 149, 90-99.
- 738 HOELLER, O., BOLOURANI, P., CLARK, J., STEPHENS, L. R., HAWKINS, P. T.,  
739 WEINER, O. D., WEEKS, G. & KAY, R. R. 2013. Two distinct functions for  
740 PI3-kinases in macropinocytosis. *J. Cell Sci.*, 126, 4296-307.
- 741 JUNEMANN, A., FILIC, V., WINTERHOFF, M., NORDHOLZ, B., LITSCHKO, C.,  
742 SCHWELLENBACH, H., STEPHAN, T., WEBER, I. & FAIX, J. 2016. A  
743 Diaphanous-related formin links Ras signaling directly to actin assembly  
744 in macropinocytosis and phagocytosis. *Proc. Natl. Acad. Sci. USA*, 113,  
745 E7464-E7473.
- 746 KATOH, M., CHEN, G., ROBERGE, E., SHAULSKY, G. & KUSPA, A. 2007.  
747 Developmental commitment in *Dictyostelium discoideum*. *Eukaryot. Cell*, 6,  
748 2038-2045.
- 749 KAY, R. R. 1989. Evidence that elevated intracellular cyclic AMP triggers spore  
750 maturation in *Dictyostelium*. *Development*, 105, 753-759.
- 751 KAYMAN, S. C. & CLARKE, M. 1983. Relationship between axenic growth of  
752 *Dictyostelium discoideum* strains and their track morphology on  
753 substrates coated with gold particles. *J. Cell Biol.*, 97, 1001-1010.
- 754 KHOSLA, M., SPLEGELMAN, G. B. & WEEKS, G. 2005. The effect of the disruption  
755 of a gene encoding a PI4 kinase on the developmental defect exhibited by  
756 *Dictyostelium rasC-* cells. *Dev. Biol.*, 284, 412-420.
- 757 KING, J. S., GUEHO, A., HAGEDORN, M., GOPALDASS, N., LEUBA, F., SOLDATI, T. &  
758 INSALL, R. H. 2013. WASH is required for lysosomal recycling and  
759 efficient autophagic and phagocytic digestion. *Mol. Biol. Cell*, 24, 2714-26.
- 760 KING, J. S., VELTMAN, D. M. & INSALL, R. H. 2011. The induction of autophagy by  
761 mechanical stress. *Autophagy*, 7, 1490-1499.
- 762 KOIVUSALO, M., WELCH, C., HAYASHI, H., SCOTT, C. C., KIM, M., ALEXANDER, T.,  
763 TOURET, N., HAHN, K. M. & GRINSTEIN, S. 2010. Amiloride inhibits  
764 macropinocytosis by lowering submembranous pH and preventing Rac1  
765 and Cdc42 signaling. *J. Cell Biol.*, 188, 547-63.
- 766 LANGRIDGE, P. D. & KAY, R. R. 2007. Mutants in the *Dictyostelium* Arp2/3  
767 complex and chemoattractant-induced actin polymerization. *Exp. Cell Res.*,  
768 313, 2563-2574.
- 769 LEE, S., COMER, F. I., SASAKI, A., MCLEOD, I. X., DUONG, Y., OKUMURA, K., YATES,  
770 J. R., PARENT, C. A. & FIRTEL, R. A. 2005. TOR complex 2 integrates cell  
771 movement during chemotaxis and signal relay in *Dictyostelium*. *Mol. Biol.*  
772 *Cell*, 16, 4572-4583.
- 773 LEWIS, W. H. 1931. Pinocytosis. *Johns Hopkins Hosp. Bull.*, 49, 17-27.
- 774 LEWIS, W. H. 1937. Pinocytosis by malignant cells. *Cancer Res.*, 29, 666-679.
- 775 LUDLOW, M. J., TRAYNOR, D., FISHER, P. R. & ENNION, S. J. 2008. Purinergic-  
776 mediated Ca<sup>2+</sup> influx in *Dictyostelium discoideum*. *Cell Calcium*, 44, 567-  
777 579.
- 778 LUKYANENKO, V., MALYUKOVA, I., HUBBARD, A., DELANNOY, M., BOEDEKER, E.,  
779 ZHU, C., CEBOTARU, L. & KOVBASNJUK, O. 2011. Enterohemorrhagic  
780 *Escherichia coli* infection stimulates Shiga toxin 1 macropinocytosis and

- 781 transcytosis across intestinal epithelial cells. *Am. J. Physiol. Cell Physiol.*,  
782 301, C1140-9.
- 783 MAEDA, Y. 1983. Axenic growth of *Dictyostelium discoideum* wild-type NC-4 cells  
784 and its relation to endocytotic ability. *J. Gen. Microbiol.*, 129, 2467-2473.
- 785 MAEDA, Y. 1988. Changes of endocytotic activities during the cell cycle of  
786 *Dictyostelium* cells. *Devel. Growth Differ.*, 30, 15-24.
- 787 MAEDA, Y. & KAWAMOTO, T. 1986. Pinocytosis in *Dictyostelium discoideum* cells.  
788 A possible implication of cytoskeletal actin for pinocytotic activity. *Exp.*  
789 *Cell Res.*, 164, 516-526.
- 790 MAGZOUB, M., SANDGREN, S., LUNDBERG, P., OGLECKA, K., LILJA, J., WITTRUP,  
791 A., GORAN ERIKSSON, L. E., LANGEL, U., BELTING, M. & GRASLUND, A.  
792 2006. N-terminal peptides from unprocessed prion proteins enter cells by  
793 macropinocytosis. *Biochem. Biophys. Res. Commun.*, 348, 379-85.
- 794 MANN, S. K. O. & FIRTEL, R. A. 1991. A developmentally regulated, putative  
795 serine/threonine protein kinase is essential for development in  
796 *Dictyostelium*. *Mech. Devel.*, 35, 89-101.
- 797 MARECHAL, V., PREVOST, M. C., PETIT, C., PERRET, E., HEARD, J. M. &  
798 SCHWARTZ, O. 2001. Human immunodeficiency virus type 1 entry into  
799 macrophages mediated by macropinocytosis. *J. Virol.*, 75, 11166-77.
- 800 MARIN, F. T. 1976. Regulation of development in *Dictyostelium discoideum*: I.  
801 Initiation of the growth to developmental transition by amino acid  
802 starvation. *Dev. Biol.*, 48, 110-117.
- 803 MEENA, N. P. & KIMMEL, A. R. 2017. Chemotactic network responses to live  
804 bacteria show independence of phagocytosis from chemoreceptor  
805 sensing. *Elife*, 6.
- 806 MORRIS, H. R., MASENTO, M. S., TAYLOR, G. W., JERMYN, K. A. & KAY, R. R. 1988.  
807 Structure elucidation of two differentiation inducing factors (DIF-2 and  
808 DIF-3) from the cellular slime mould *Dictyostelium discoideum*. *Biochem.*  
809 *J.*, 249, 903-906.
- 810 MORRIS, H. R., TAYLOR, G. W., MASENTO, M. S., JERMYN, K. A. & KAY, R. R. 1987.  
811 Chemical structure of the morphogen differentiation inducing factor from  
812 *Dictyostelium discoideum*. *Nature*, 328, 811-814.
- 813 MUNCH, C., O'BRIEN, J. & BERTOLOTTI, A. 2011. Prion-like propagation of  
814 mutant superoxide dismutase-1 misfolding in neuronal cells. *Proc. Natl.*  
815 *Acad. Sci. USA*, 108, 3548-53.
- 816 NANBO, A., IMAI, M., WATANABE, S., NODA, T., TAKAHASHI, K., NEUMANN, G.,  
817 HALFMANN, P. & KAWAOKA, Y. 2010. *Ebolavirus* is internalized into host  
818 cells via macropinocytosis in a viral glycoprotein-dependent manner.  
819 *PLoS Pathog.*, 6, e1001121.
- 820 NORBURY, C. C., HEWLETT, L. J., PRESCOTT, A. R., SHASTRI, N. & WATTS, C. 1995.  
821 Class I MHC presentation of exogenous soluble antigen via  
822 macropinocytosis in bone marrow macrophages. *Immunity*, 3, 783-91.
- 823 NOVAK, K. D., PETERSON, M. D., REEDY, M. C. & TITUS, M. A. 1995. *Dictyostelium*  
824 myosin I double mutants exhibit conditional defects in pinocytosis. *J. Cell*  
825 *Biol.*, 131, 1205-1221.
- 826 PAN, M., XU, X., CHEN, Y. & JIN, T. 2016. Identification of a Chemoattractant G-  
827 Protein-Coupled Receptor for Folic Acid that Controls Both Chemotaxis  
828 and Phagocytosis. *Dev. Cell*, 36, 428-39.

- 829 PARENT, C. A., BLACKLOCK, B. J., FROELICH, W. M., MURPHY, D. B. &  
830 DEVREOTES, P. N. 1998. G Protein signaling events are activated at the  
831 leading edge of chemotactic cells. *Cell*, 95, 81-91.
- 832 PATEL, H. & BARBER, D. L. 2005. A developmentally regulated Na-H exchanger in  
833 *Dictyostelium discoideum* is necessary for cell polarity during chemotaxis.  
834 *J. Cell Biol.*, 169, 321-329.
- 835 PRAMANIK, M. K., IJIMA, M., IWADATE, Y. & YUMURA, S. 2009. PTEN is a  
836 mechanosensing signal transducer for myosin II localization in  
837 *Dictyostelium* cells. *Genes to Cells*, 14, 821-834.
- 838 PRIMPKE, G., IASSONIDOU, V., NELLEN, W. & WETTERAUER, B. 2000. Role of  
839 cAMP-dependent protein kinase during growth and early development of  
840 *Dictyostelium discoideum*. *Dev. Biol.*, 221, 101-111.
- 841 RIVERO, F. & MANIAK, M. 2006. Quantitative and microscopic methods for  
842 studying the endocytic pathway. *Methods Mol. Biol.*, 346, 423-438.
- 843 RODRIGUEZ, M., KIM, B., LEE, N. S., VEERANKI, S. & KIM, L. 2008. MPL1, a novel  
844 phosphatase with leucine-rich repeats, is essential for proper ERK2  
845 phosphorylation and cell motility. *Euk. Cell.*, 7, 958-966.
- 846 ROSEL, D., KHURANA, T., MAJITHIA, A., HUANG, X., BHANDARI, R. & KIMMEL, A.  
847 R. 2012. TOR complex 2 (TORC2) in *Dictyostelium* suppresses phagocytic  
848 nutrient capture independently of TORC1-mediated nutrient sensing. *J.*  
849 *Cell Sci.*, 125, 37-48.
- 850 SAITO, T., TAYLOR, G. W., YANG, J. C., NEUHAUS, D., STETSENKO, D., KATO, A. &  
851 KAY, R. R. 2006. Identification of new differentiation inducing factors  
852 from *Dictyostelium discoideum*. *Biochim. Biophys. Acta*, 1760, 754-761.
- 853 SALLUSTO, F., CELLA, M., DANIELI, C. & LANZAVECCHIA, A. 1995. Dendritic cells  
854 use macropinocytosis and the mannose receptor to concentrate  
855 macromolecules in the major histocompatibility complex class II  
856 compartment: downregulation by cytokines and bacterial products. *J. Exp.*  
857 *Med.*, 182, 389-400.
- 858 SANCAK, Y., BAR-PELED, L., ZONCU, R., MARKHARD, A. L., NADA, S. & SABATINI,  
859 D. M. 2010. Ragulator-Rag complex targets mTORC1 to the lysosomal  
860 surface and is necessary for its activation by amino acids. *Cell*, 141, 290-  
861 303.
- 862 SCAVELLO, M., PETLICK, A. R., RAMESH, R., THOMPSON, V. F., LOTFI, P. &  
863 CHAREST, P. G. 2017. Protein kinase A regulates the Ras, Rap1 and TORC2  
864 pathways in response to the chemoattractant cAMP in *Dictyostelium*. *J.*  
865 *Cell Sci.*, 130, 1545-1558.
- 866 SHAULSKY, G., FULLER, D. & LOOMIS, W. F. 1998. A cAMP-phosphodiesterase  
867 controls PKA-dependent differentiation. *Development*, 125, 691-699.
- 868 SHU, S., LIU, X. & KORN, E. D. 2005. Blebbistatin and blebbistatin-inactivated  
869 myosin II inhibit myosin II-independent processes in *Dictyostelium*. *Proc.*  
870 *Natl. Acad. Sci. USA*, 102, 1472-1477.
- 871 SHUTES, A., ONESTO, C., PICARD, V., LEBLOND, B., SCHWEIGHOFFER, F. & DER, C.  
872 J. 2007. Specificity and mechanism of action of EHT 1864, a novel small  
873 molecule inhibitor of Rac family small GTPases. *J. Biol. Chem.*, 282, 35666-  
874 78.
- 875 SUESS, P. M. & GOMER, R. H. 2016. Extracellular Polyphosphate Inhibits  
876 Proliferation in an Autocrine Negative Feedback Loop in *Dictyostelium*  
877 *discoideum*. *J. Biol. Chem.*, 291, 20260-9.

- 878 TANIURA, H., SANADA, N., KURAMOTO, N. & YONEDA, Y. 2006. A metabotropic  
879 glutamate receptor family gene in *Dictyostelium discoideum*. *J. Biol. Chem.*,  
880 281, 12336-12343.
- 881 THILO, L. & VOGEL, G. 1980. Kinetics of membrane internalization and recycling  
882 during pinocytosis in *Dictyostelium discoideum*. *Proc. Natl. Acad. Sci. USA*,  
883 77, 1015-1019.
- 884 THOMASON, P. A., TRAYNOR, D., CAVET, G., CHANG, W.-T., HARWOOD, A. J. &  
885 KAY, R. R. 1998. An intersection of the cAMP/PKA and two-component  
886 signal transduction systems in *Dictyostelium*. *EMBO J.*, 17, 2838-2845.
- 887 THOMASON, P. A., TRAYNOR, D., STOCK, J. B. & KAY, R. R. 1999. The RdeA-RegA  
888 system, a eukaryotic phospho-relay controlling cAMP breakdown. *J. Biol.*  
889 *Chem.*, 274, 27379-27384.
- 890 THOREEN, C. C. & SABATINI, D. M. 2009. Rapamycin inhibits mTORC1, but not  
891 completely. *Autophagy*, 5, 725-6.
- 892 TRAYNOR, D. & KAY, R. R. 2017. A polycystin-type transient receptor potential  
893 (Trp) channel that is activated by ATP. *Biol Open*, 6, 200-209.
- 894 VELTMAN, D. M. 2015. Drink or drive: competition between macropinocytosis  
895 and cell migration. *Biochem. Soc. Trans.*, 43, 129-32.
- 896 VELTMAN, D. M., WILLIAMS, T. D., BLOOMFIELD, G., CHEN, B. C., BETZIG, E.,  
897 INSALL, R. H. & KAY, R. R. 2016. A plasma membrane template for  
898 macropinocytic cups. *Elife*, 5, e20085.
- 899 WATTS, D. J. & ASHWORTH, J. M. 1970. Growth of myxamoebae of the cellular  
900 slime mould *Dictyostelium discoideum* in axenic culture. *Biochem. J.*, 119,  
901 171-174.
- 902 WU, L. J., VALKEMA, R., VAN HAASSTERT, P. J. M. & DEVREOTES, P. N. 1995. The G  
903 protein beta subunit is essential for multiple responses to  
904 chemoattractants in *Dictyostelium*. *J. Cell Biol.*, 129, 1667-1675.
- 905 YOSHIDA, S., PACITTO, R., YAO, Y., INOKI, K. & SWANSON, J. A. 2015. Growth  
906 factor signaling to mTORC1 by amino acid-laden macropinosomes. *J. Cell*  
907 *Biol.*, 211, 159-72.

## 909 **Figure Legends**

910

### 911 **Figure 1: Fluid uptake measurement by high-throughput flow cytometry.**

912 **A)** Sodium azide causes efficient detachment of cells in 96-well plates. Attached  
913 cells were incubated with sodium azide for 5 minutes and the proportion  
914 remaining attached was measured using crystal violet staining (Bloomfield et al.,  
915 2015). **B)** Sodium azide prevents significant exocytosis of TRITC-dextran for at  
916 least 2-3 hours. Cells, loaded with dextran, were washed and incubated in 5 mM  
917 sodium azide and intracellular fluorescence measured by flow cytometry. **C)**  
918 Representative dot-plots showing forward and side scatter for beads, bacteria,  
919 yeast and *Dictyostelium* cells. *Dictyostelium* is easily distinguished from bacteria,  
920 beads and background particles by gating, but cannot be separated fully from

921 yeast particles. **D)** Representative histograms showing the internalised TRITC-  
922 dextran of individual cells within a population over time. Axenically grown Ax2  
923 cells were incubated in shaking suspension with TRITC-dextran for up to two  
924 hours and analysed by flow cytometry. TRITC-dextran accumulates in every cell,  
925 although there is a lagging tail of cells with lower fluid uptake. **E)** Fluid uptake  
926 time-course of Ax2 cells in a 96-well plate. TRITC-dextran uptake proceeds  
927 linearly for the first 60-90 minutes, then plateaus as it begins to be exocytosed.  
928 All error bars show s.e.m.; n=3 in all experiments.

929

### 930 **Table 1: Effect of inhibitors on macropinocytosis**

931 Inhibitors were added at several concentrations to axenically growing Ax2 cells  
932 in 96-well plates in conjunction with TRITC-dextran for one hour and the fluid  
933 uptake of the cells during that time determined. Dose response curves are shown  
934 for the inhibitors that were effective in inhibiting macropinocytosis in figure S2.  
935 These were repeated three times.

936

### 937 **Figure 2: Cells adapt to growth on liquid media by increasing their rates of** 938 **fluid uptake and macropinocytosis**

939 **A)** Macropinocytosis increases when cells grown on bacteria are transferred to  
940 liquid medium. Fluid uptake was either measured immediately after harvesting  
941 cells from bacteria (control) or after 24 hours in the indicated media (n=3). **B)**  
942 Kinetics of the increase in fluid uptake by Ax2 cells during adaptation to nutrient  
943 media (n=3). **C)** The rate of macropinosome formation increases in Ax2 cells  
944 adapted to nutrient media. Macropinosome formation was measured  
945 microscopically after a 1-minute pulse with FITC-dextran (n=7). **D)** The size of  
946 macropinosomes increases in Ax2 cells adapted to nutrient media. The  
947 maximum diameter of macropinosomes at the moment of closure was measured  
948 in the mid-section of cells using the PIP3 reporter PkgE-PH mCherry on 3  
949 separate days. **E)** Macropinosome formation increases in DdB cells adapted to  
950 HL5 fortified with 10% FCS (n=6). **F)** Macropinosome size does not increase in  
951 DdB cells adapted to liquid media. Cells were imaged on 3 separate days.  
952 Ax2 is a standard laboratory strain able to grow in HL5 medium, which has the  
953 NF1 gene, deleted; DdB is its non-axenic parent with an intact NF1 gene. In all

954 experiments cells were grown on bacteria, washed and then transferred to the  
955 indicated media. Excluding panel B, the control measurements were made with  
956 cells freshly harvested from bacteria and the others after 24 hours incubation in  
957 the indicated media. Fluid uptake and other measurements were made as  
958 described in the Materials and Methods. Error bars show the s.e.m..

959

960 **Figure 3: Macropinocytosis upregulation can be induced by a minimal**  
961 **medium containing glucose, arginine, lysine and glutamate.**

962 **A)** The defined SIH medium efficiently induces upregulation of macropinocytosis  
963 in cells transferred from bacteria. The complex HL5 medium is shown for  
964 comparison (n=3). **B)** Broad dissection of SIH medium shows that the amino  
965 acids and glucose are responsible for its ability to stimulate macropinocytosis  
966 upregulation (n=7). **C)** Detailed dissection of SIH medium (see supplementary  
967 tables 1 and 2) shows that arginine, glutamate and lysine (R, E and K) are needed  
968 for efficient upregulation of macropinocytosis (n=5). **D)** A minimal medium  
969 containing arginine, glutamate, lysine and glucose (SUM) gives efficient  
970 upregulation of macropinocytosis. The kinetics of upregulation induced by SUM,  
971 glucose and amino acids and SIH are compared (n=3).

972 Ax2 cells grown on bacteria were washed free of bacteria and transferred to the  
973 indicated media for 24 hours, unless indicated otherwise, and then fluid uptake  
974 measured by flow cytometry as described in materials and methods. Error bars  
975 show the s.e.m..

976

977

978 **Figure 4: Evidence that macropinocytosis upregulation depends on**  
979 **macropinocytosis**

980 To test whether macropinocytosis upregulation depends on macropinocytosis,  
981 inhibitors with differing targets (see Table 1) were used to inhibit  
982 macropinocytosis during the upregulation period. The inhibitor was then  
983 washed away and the degree of upregulation determined by measuring fluid  
984 uptake compared to untreated controls ('raw' curves). To control for long-term  
985 effects of the inhibitors, cells with fully upregulated macropinocytosis were  
986 treated in parallel and the results corrected accordingly ('corrected' curves; see

987 Figure S4). Inhibitors used and their nominal targets: **A)** LY29004 (PI3-kinase,  
988 n=3); **(B)** TGX221 (PI3-kinase, n=4); **(C)** CK666 (Arp2/3 complex, n=4); **(D)**  
989 EHT1864 (Rac, n=4); **(E)** Torin 1 (Tor, n=3). **F)** Rapamycin (TORC1, n=3). Ax2  
990 cells, harvested from bacteria, were incubated in HL5 in 96-well plates with the  
991 inhibitors for 10 hours, then the inhibitors washed away by dunk-banging, the  
992 cells allowed to recover for 10 minutes and the fluid uptake measured over 1  
993 hour using the high-throughput flow cytometry assay. To correct for deleterious  
994 effects of the inhibitors, control Ax2 cells grown in HL5 (with maximally  
995 upregulated macropinocytosis) were similarly treated with inhibitors for 10  
996 hours and their fluid uptake compared to untreated controls to give the  
997 correction factor: Uptake(drug-treated control cells)/Uptake(vehicle-treated  
998 control cells) by which the raw data was multiplied to give the corrected curves.  
999 Error bars show the s.e.m..

1000

1001 **Figure 5: Long-term regulation of macropinocytosis by bacteria and their**  
1002 **product, folate**

1003 **A)** Bacteria inhibit the upregulation of macropinocytosis by cells transferred to  
1004 HL5 medium. Ax2 cells transferred from bacteria (low macropinocytosis) to  
1005 HL5, upregulate macropinocytosis, but this is blocked by addition of *Ka* bacteria  
1006 (2 OD<sub>600 nm</sub>) to the HL5 (n=6). **B)** Bacteria induce downregulation of  
1007 macropinocytosis by cells taken from HL5 medium. Ax2 cells transferred from  
1008 HL5 medium (high macropinocytosis) to KK<sub>2</sub>MC buffer maintain their rate of  
1009 macropinocytosis, but the addition of 2 OD<sub>600 nm</sub> *Ka* bacteria induces  
1010 downregulation (n=6). **C)** Folate delays the upregulation of macropinocytosis by  
1011 cells transferred to HL5 medium. Ax2 cells transferred from bacteria (low  
1012 macropinocytosis) to HL5 medium, upregulate macropinocytosis, but this is  
1013 delayed by 500  $\mu$ M folate (n=6). **D)** The folate receptor (fAR1) mediates the  
1014 inhibitory effect of folate on macropinocytosis upregulation. Wild-type Ax2 cells  
1015 and a null mutant for the folate receptor (fAR1-) were transferred from bacteria  
1016 (low macropinocytosis) to HL5 medium with or without 500  $\mu$ M folate and  
1017 macropinocytosis measured after 6 hours (n=5). **E)** The heterotrimeric G-  
1018 protein cognate to the folate receptor mediates the inhibitory effect of folate on  
1019 macropinocytosis upregulation. Wild-type Ax2 cells and null mutants for G $\alpha$ 4

1020 (*gpaD*-) and G $\beta$  (*gpbA*-) were transferred from bacteria (low macropinocytosis)  
1021 to HL5 medium with or without 500  $\mu$ M folate and macropinocytosis measured  
1022 after 6 hours (n=5). **F)** The MAP-kinase, ErkB, a downstream effector of the  
1023 folate receptor mediates the inhibitory effect of folate on macropinocytosis  
1024 upregulation. Wild-type Ax2 cells and null mutants for ErkB (*erkB*-) were  
1025 transferred from bacteria (low macropinocytosis) to HL5 medium with or  
1026 without 500  $\mu$ M folate and macropinocytosis measured after 6 hours (n=3).  
1027 Fluid uptake was measured by high-throughput flow cytometry. Error bars are  
1028 the s.e.m..

1029

1030 **Figure 6: Macropinocytosis is downregulated by developmental signalling**  
1031 **that likely acts through PKA**

1032 **A)** Macropinocytosis is downregulated during development. Ax2 cells grown in  
1033 HL5 (high macropinocytosis) were washed free of nutrients and allowed to  
1034 develop in standard conditions: shaken in suspension and pulsed with cyclic-  
1035 AMP every 6 minutes after the first hour (n=5). **B)** Downregulation of  
1036 macropinocytosis depends on the cell density. Axenically growing cells were  
1037 allowed to settle at high (50,000 cells well<sup>-1</sup>) and low (5000 cells well<sup>-1</sup>) in 96-  
1038 well plates, washed free of nutrient media and incubated in buffer for the  
1039 indicated times before fluid uptake was determined as described in the materials  
1040 and methods (n=6). **C)** Downregulation of cells at low density is induced by  
1041 conditioned medium. Conditioned KK<sub>2</sub>MC (CM) prepared by shaking starving  
1042 cells at high density for 8 hours was tested for its ability to induce  
1043 downregulation of macropinocytosis by Ax2 cells. The CM was both size  
1044 fractionated and heat-treated at 75°C for 30 min to further investigate the  
1045 properties of the secreted product responsible for downregulation induction  
1046 (n=3). **D)** Downregulation of cells at low density is induced by 8-Br-cAMP, which  
1047 activates PKA, when incubated with the cells for 24 hours (n=5). **E)** Mutations  
1048 giving elevated intra-cellular cyclic-AMP levels bypass the need for  
1049 developmental signalling to downregulate macropinocytosis. *regA*- and *rdeA*-  
1050 cells have elevated intracellular cyclic-AMP due to reduced breakdown, and  
1051 downregulate macropinocytosis when incubated in KK<sub>2</sub>MC rather than HL5 for  
1052 24 hours, unlike Ax2 (n=5). **F)** Macropinocytosis is not downregulated in a



1053 mutant lacking PKA activity (*pkaC*-), even when incubated in CM or at high  
1054 density in buffer (n=6). Error bars show the s.e.m..  
1055

# Figure 1

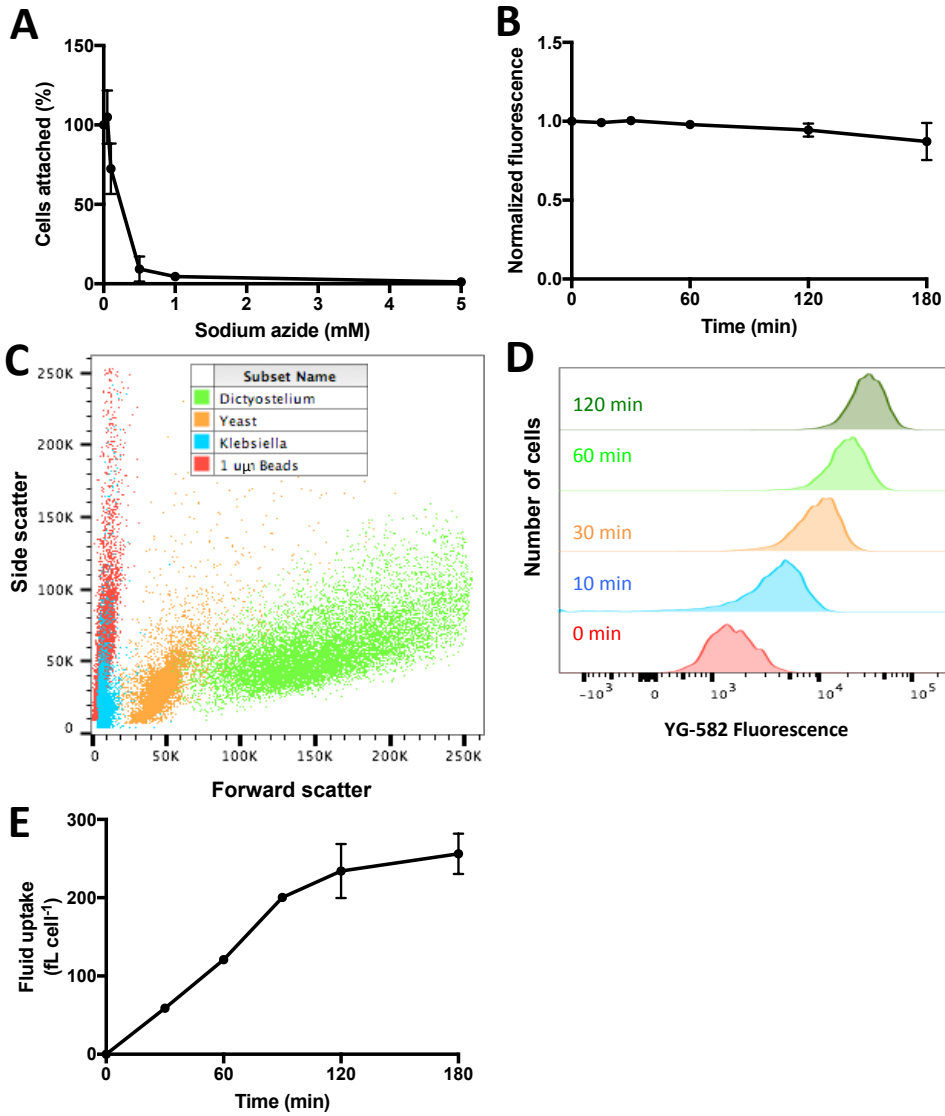

# Table 1

| Inhibitor      | Source            | Molecular target(s)                       | Inhibits macropinocytosis? | IC <sub>50</sub> (μM) | Maximum inhibition (μM) | Maximum dose tested (μM) |
|----------------|-------------------|-------------------------------------------|----------------------------|-----------------------|-------------------------|--------------------------|
| Latrunculin B  | Sigma-Aldrich     | F-actin                                   | Yes                        | 1                     | 5                       | 10                       |
| Cytochalasin A | Cayman            | F-actin                                   | Yes                        | 1.7                   | 10                      | 10                       |
| Cytochalasin B | Sigma-Aldrich     | F-actin                                   | No                         | N/A                   | N/A                     | 200                      |
| Cytochalasin D | Cayman            | F-actin                                   | No                         | N/A                   | N/A                     | 200                      |
| Jasplakinolide | Santa Cruz        | F-actin                                   | No                         | N/A                   | N/A                     | 20                       |
| CK666          | Sigma-Aldrich     | Arp2/3                                    | Yes                        | 30                    | 60                      | 100                      |
| SMIFH2         | Sigma-Aldrich     | Formins                                   | Yes                        | 5                     | 30                      | 100                      |
| Wiskostatin    | Sigma-Aldrich     | WASP                                      | Yes                        | 2.75                  | 10                      | 10                       |
| Nocodazole     | Sigma-Aldrich     | Microtubules                              | Yes                        | 70                    | 70                      | 300                      |
| Thiabendazole  | Sigma-Aldrich     | Microtubules                              | Yes                        | 70                    | 150                     | 200                      |
| Blebbistatin   | Sigma-Aldrich     | Myosin II                                 | No                         | N/A                   | N/A                     | 100                      |
| Dynasore       | Sigma-Aldrich     | Dynamin                                   | No                         | N/A                   | N/A                     | 310                      |
| LY294002       | Cayman            | PI3K, TORC2                               | Yes                        | 38                    | 75                      | 200                      |
| BYL719         | Cayman            | PI3K alpha                                | No                         | N/A                   | N/A                     | 250                      |
| TGX221         | Cayman            | PI3K beta                                 | Yes                        | 60                    | 150                     | 200                      |
| CAL101         | Cayman            | PI3K gamma                                | No                         | N/A                   | N/A                     | 250                      |
| EHT1864        | Cayman            | Rac                                       | Yes                        | 0.03                  | 0.1                     | 0.1                      |
| Rapamycin      | Sigma-Aldrich     | TORC1                                     | No                         | N/A                   | N/A                     | 10                       |
| PP242          | Sigma-Aldrich     | TORC1, TORC2                              | No                         | N/A                   | N/A                     | 200                      |
| Palomid 529    | Sigma-Aldrich     | TORC1, TORC2                              | No                         | N/A                   | N/A                     | 500                      |
| Torin 1        | Sigma-Aldrich     | TORC1, TORC2                              | Yes                        | 20                    | 50                      | 125                      |
| Amiloride      | Adooq Biosciences | Na <sup>+</sup> /H <sup>+</sup> exchanger | No                         | N/A                   | N/A                     | 200                      |
| EIPA           | Cayman            | Na <sup>+</sup> /H <sup>+</sup> exchanger | No                         | N/A                   | N/A                     | 200                      |
| EGTA           | Sigma-Aldrich     | Extracellular calcium                     | No                         | N/A                   | N/A                     | 2000                     |

# Figure 2

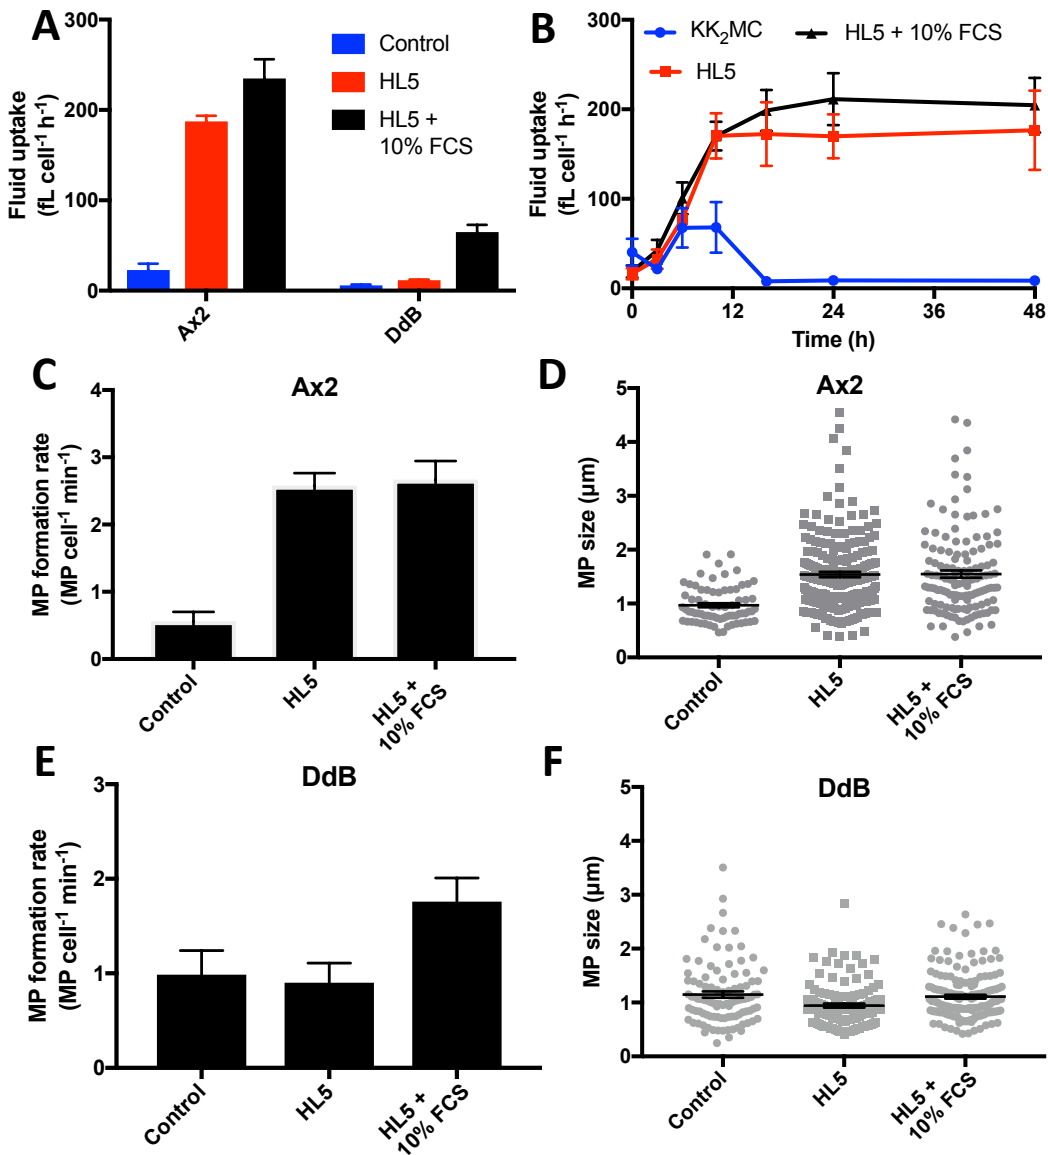

# Figure 3

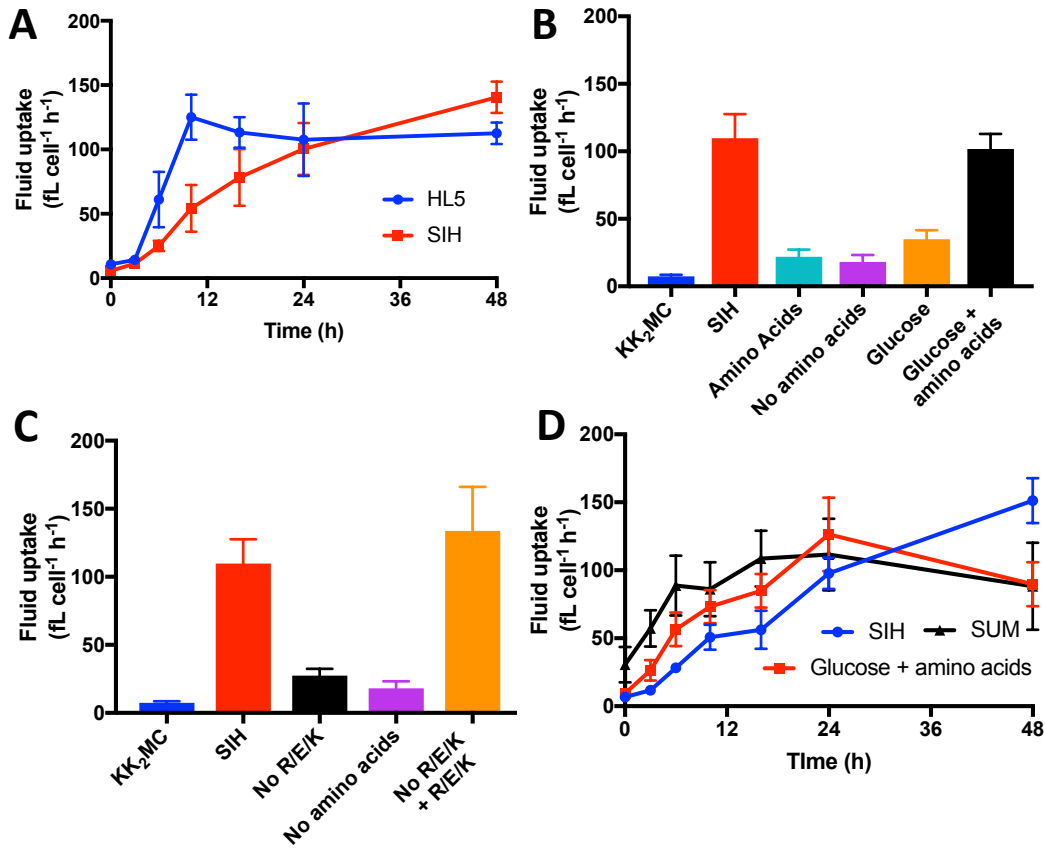

# Figure 4

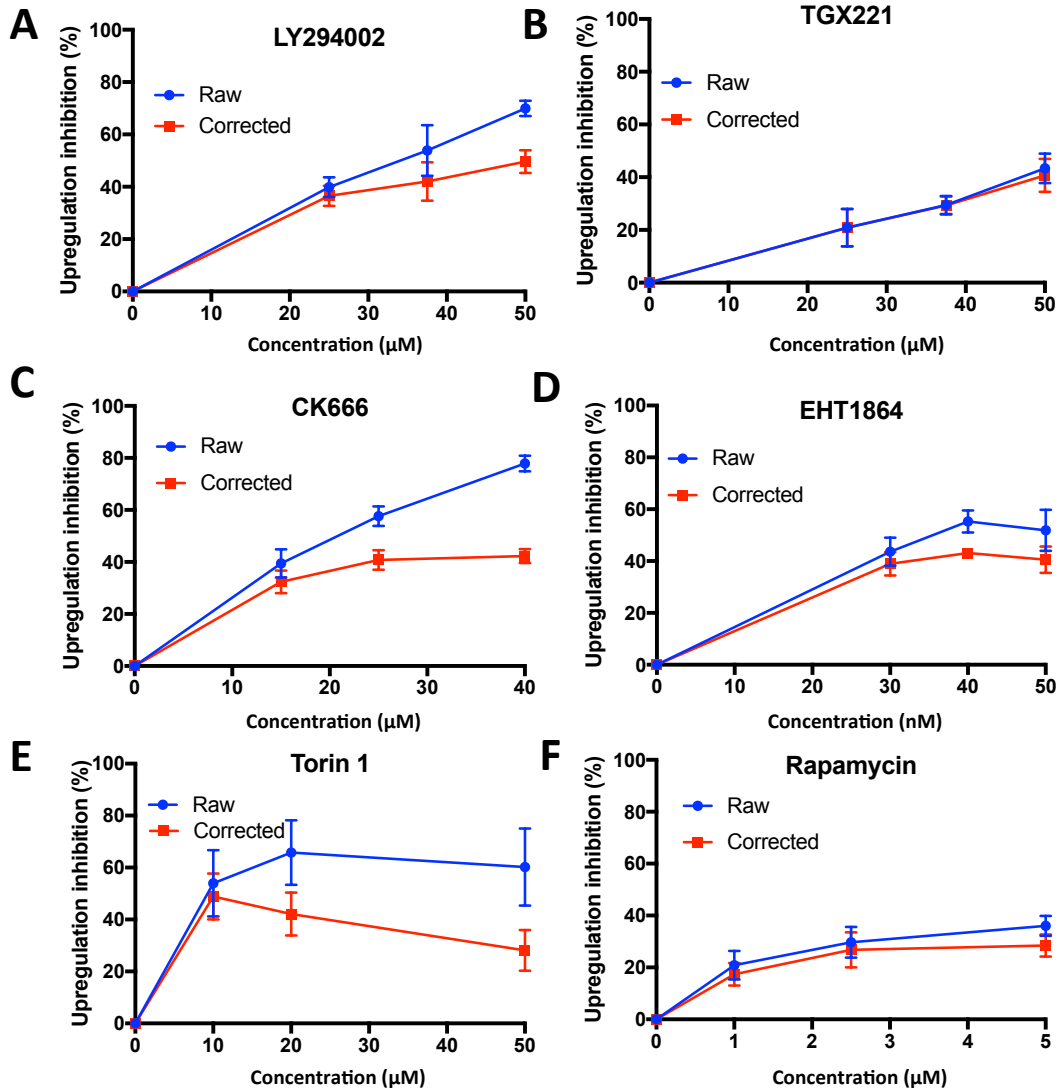

# Figure 5

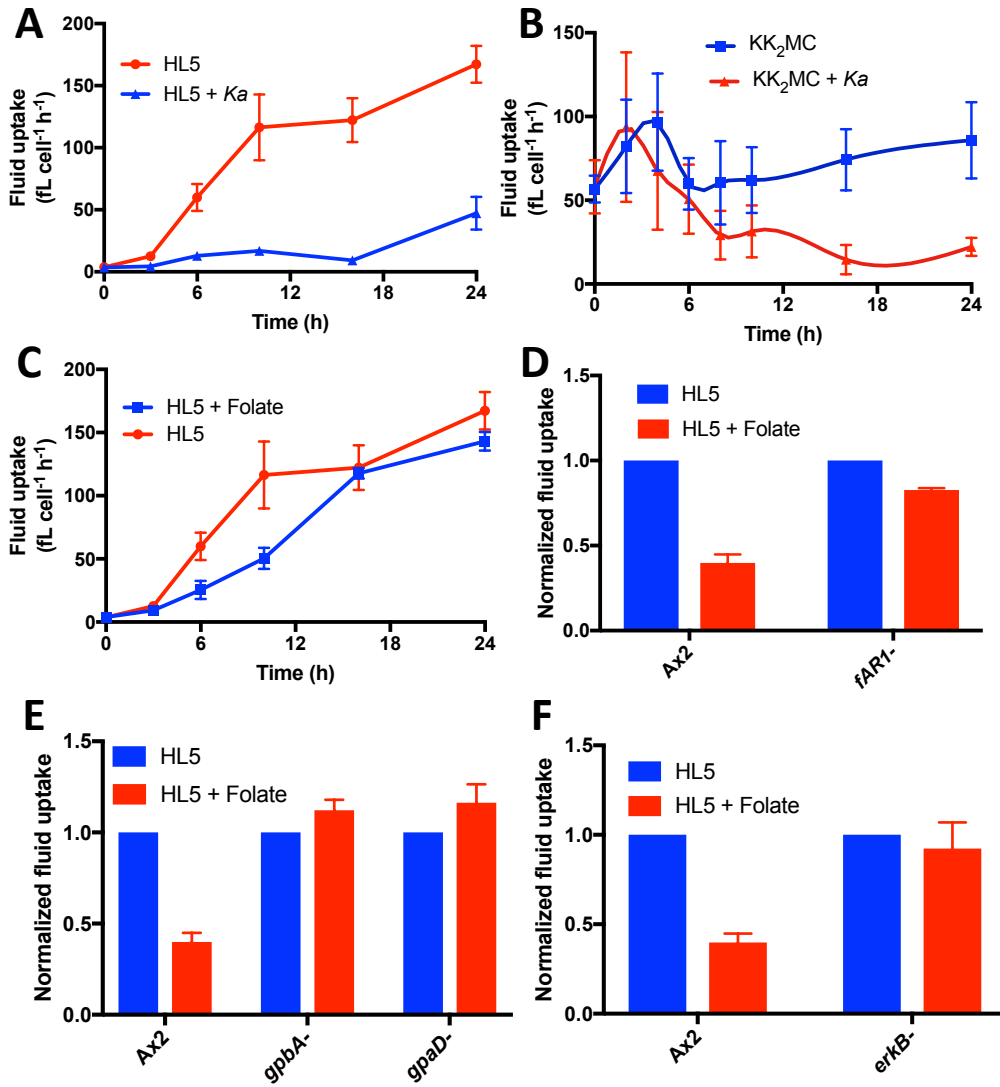

# Figure 6

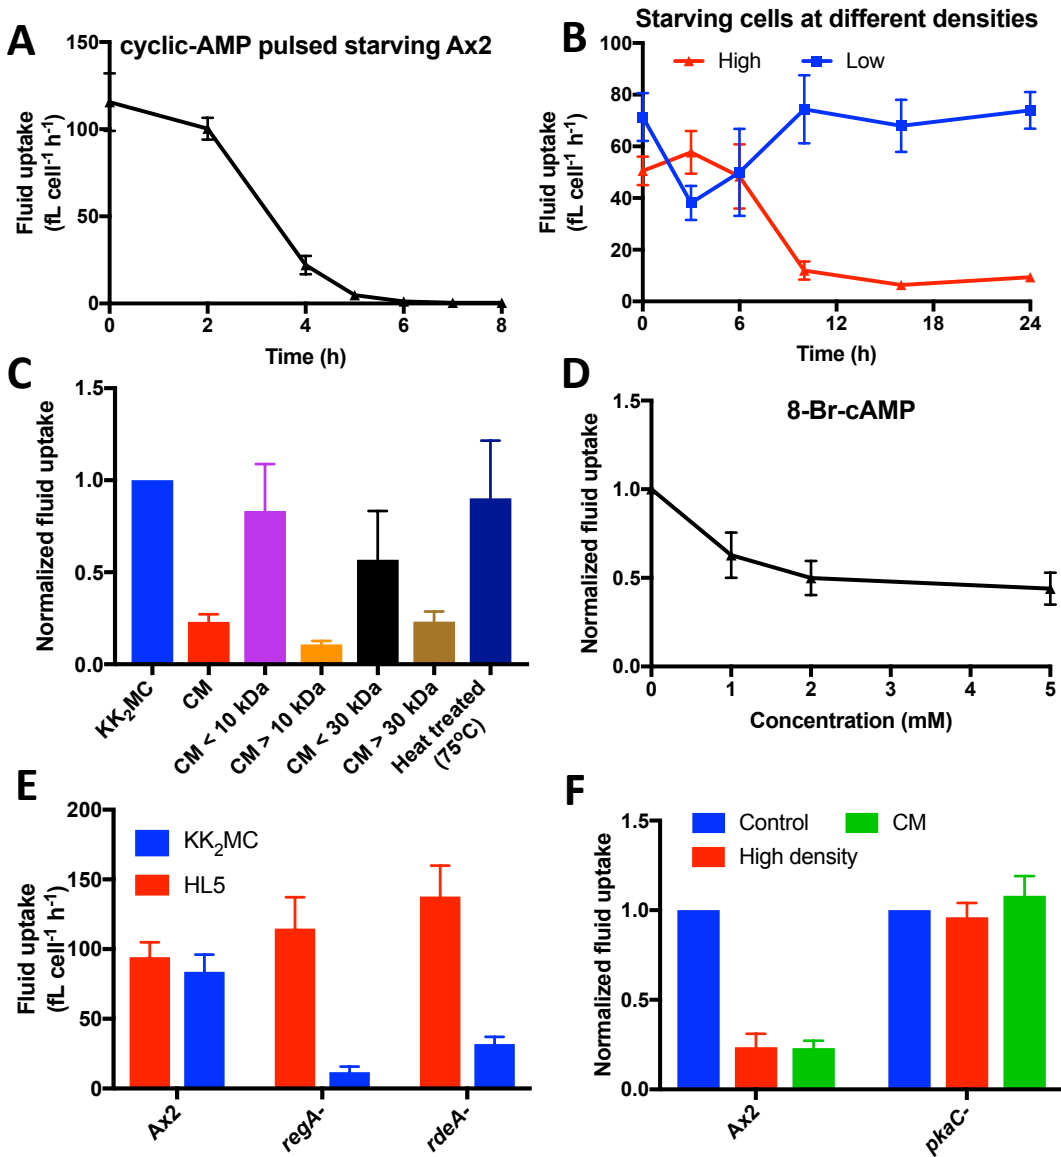

Source: https://www.biorxiv.org/content/10.1101/227983v1.full.pdf
